1 Comparative gene regulatory networks modulating *APOE* expression in microglia  
2 and astrocytes

3

4 Logan Brase<sup>1,2</sup>, Yanbo Yu<sup>1,2</sup>, Eric McDade<sup>3</sup>, Dominantly Inherited Alzheimer Network (DIAN)<sup>°</sup>,  
5 Oscar Harari<sup>1,2,4,¶</sup>, Bruno A. Benitez<sup>5,¶,\*</sup>

6

7 Affiliations:

8 1. Department of Psychiatry, Washington University, Saint Louis, St. Louis, Missouri, United States of America

9 2. The Charles F. and Joanne Knight Alzheimer Disease Research Center, Washington University, St. Louis,  
10 Missouri, United States of America

11 3. Department of Neurology, Washington University School of Medicine in St. Louis, St. Louis, MO, USA

12 4. Department of Neurology, Division of Neurogenetics, The Ohio State University, Columbus, OH, United States  
13 of America

14 5. Department of Neurology and Neuroscience, Harvard Medical School and Beth Israel Deaconess Medical  
15 Center, Boston, Massachusetts, United States of America

16

17 <sup>°</sup> A list of authors and their affiliations appears at the end of the paper.

18 <sup>¶</sup> Equally contributing senior author

19 \* Corresponding author

20 E-mail: bbenitez@bidmac.harvard.edu

## 21 Abstract

22 **Background:** Single-cell technologies have unveiled various transcriptional states in different  
23 brain cell types. Transcription factors (TFs) regulate the expression of related gene sets, thereby  
24 controlling these diverse expression states. Apolipoprotein E (*APOE*), a pivotal risk-modifying  
25 gene in Alzheimer's disease (AD), is expressed in specific glial transcriptional states associated  
26 with AD. However, it is still unknown whether the upstream regulatory programs that modulate  
27 its expression are shared across brain cell types or specific to microglia and astrocytes.

28  
29 **Methods:** We used pySCENIC to construct state-specific gene regulatory networks (GRNs) for  
30 resting and activated cell states within microglia and astrocytes based on single-nucleus RNA  
31 sequencing data from AD patients' cortices from the Knight ADRC-DIAN cohort. We then  
32 identified replicating TF using data from the ROSMAP cohort. We identified sets of genes co-  
33 regulated with *APOE* by clustering the GRN target genes and identifying genes differentially  
34 expressed after the virtual knockout of TFs regulating *APOE*. We performed enrichment analyses  
35 on these gene sets and evaluated their overlap with genes found in AD GWAS loci.

36  
37 **Results:** We identified an average of 96 replicating regulators for each microglial and astrocyte  
38 cell state. Our analysis identified the CEBP, JUN, FOS, and FOXO TF families as key regulators of  
39 microglial *APOE* expression. The steroid/thyroid hormone receptor families, including the THR  
40 TF family, consistently regulated *APOE* across astrocyte states, while CEBP and JUN TF families  
41 were also involved in resting astrocytes. AD GWAS-associated genes (*PGRN*, *FCGR3A*, *CTSH*,  
42 *ABCA1*, *MARCKS*, *CTSB*, *SQSTM1*, *TSC22D4*, *FCER1G*, and HLA genes) are co-regulated with  
43 *APOE*. We also uncovered that *APOE*-regulating TFs were linked to circadian rhythm (*BHLHE40*,  
44 *DBP*, *XBP1*, *CREM*, *SREBF1*, *FOXO3*, and *NR2F1*).

45  
46 **Conclusions:** Our findings reveal a novel perspective on the transcriptional regulation of *APOE* in  
47 the human brain. We found a comprehensive and cell-type-specific regulatory landscape for  
48 *APOE*, revealing distinct and shared regulatory mechanisms across microglia and astrocytes,  
49 underscoring the complexity of *APOE* regulation. *APOE*-co-regulated genes might also affect AD  
50 risk. Furthermore, our study uncovers a potential link between circadian rhythm disruption and  
51 *APOE* regulation, shedding new light on the pathogenesis of AD.

52

53

54 **Keywords:** Alzheimer Disease, *APOE*, single-nucleus RNA-seq, gene regulatory networks,  
55 microglia, astrocyte

## 56 Introduction

57 Alzheimer disease (AD) is a progressive neurodegenerative disorder that affects millions of  
58 people worldwide. It is characterized by cognitive impairment, memory loss, and behavioral  
59 changes. The strongest genetic risk modifiers are variants in the gene *APOE*. It is involved in lipid  
60 transport and metabolism in the brain and has two primary variants that influence disease risk,  
61  $\epsilon 2$  (protective) and  $\epsilon 4$  (risk). *APOE* is constitutively expressed in astrocytes and activated  
62 microglia<sup>1</sup>, cell types that are key players in neuroinflammation and neurodegenerative  
63 processes<sup>2</sup>.

64 When activated, microglial cells can significantly upregulate *APOE* expression, a process that is  
65 crucial for the phagocytic clearance of amyloid-beta and other debris<sup>3</sup>. Astrocytes, utilize *APOE*  
66 to support the lipid and energy demands of the surrounding neurons<sup>4</sup>. The  $\epsilon 4$  allele, in  
67 particular, has been associated with a detrimental effect on microglial activation and astrocytic  
68 function, exacerbating neuroinflammatory and neurodegenerative processes<sup>2-4</sup>. These  
69 expression states are not static; they evolve in response to the brain's pathological environment,  
70 influencing disease progression and severity. Understanding the differences in *APOE* expression  
71 regulation between microglial and astrocytic cell states can provide valuable insights into the  
72 molecular mechanisms underlying *APOE*'s involvement in AD and potentially other  
73 neurodegenerative disorders.

74 In this study, we aimed to further investigate the differences in the regulation of *APOE*  
75 expression between various microglial and astrocytic cell states using single-nucleus RNA-seq  
76 (snRNA-seq). To this end, we performed state-specific gene regulatory network (GRN) analysis  
77 using pySCENIC on specific cell states (Figure 1). We then used two approaches to identify gene  
78 sets co-regulated with *APOE* in these networks: co-regulatory network clusters and transcription  
79 factor knockout (TF-KO) differentially expressed genes (DEGs). We assessed the relevance of  
80 these gene sets to AD by testing their overlap with AD genome-wide association study (GWAS)  
81 genes and their enrichment in AD-related pathways. By delineating the GRNs in these critical  
82 cell states, we seek to elucidate the distinct transcriptional regulatory mechanisms that govern  
83 *APOE* expression, which is crucial for unraveling the complex interplay between *APOE* regulation  
84 and AD pathogenesis. This knowledge may lead to the development of targeted therapeutic

85 interventions to modulate *APOE*-related biology in specific cell types to mitigate disease  
 86 progression.

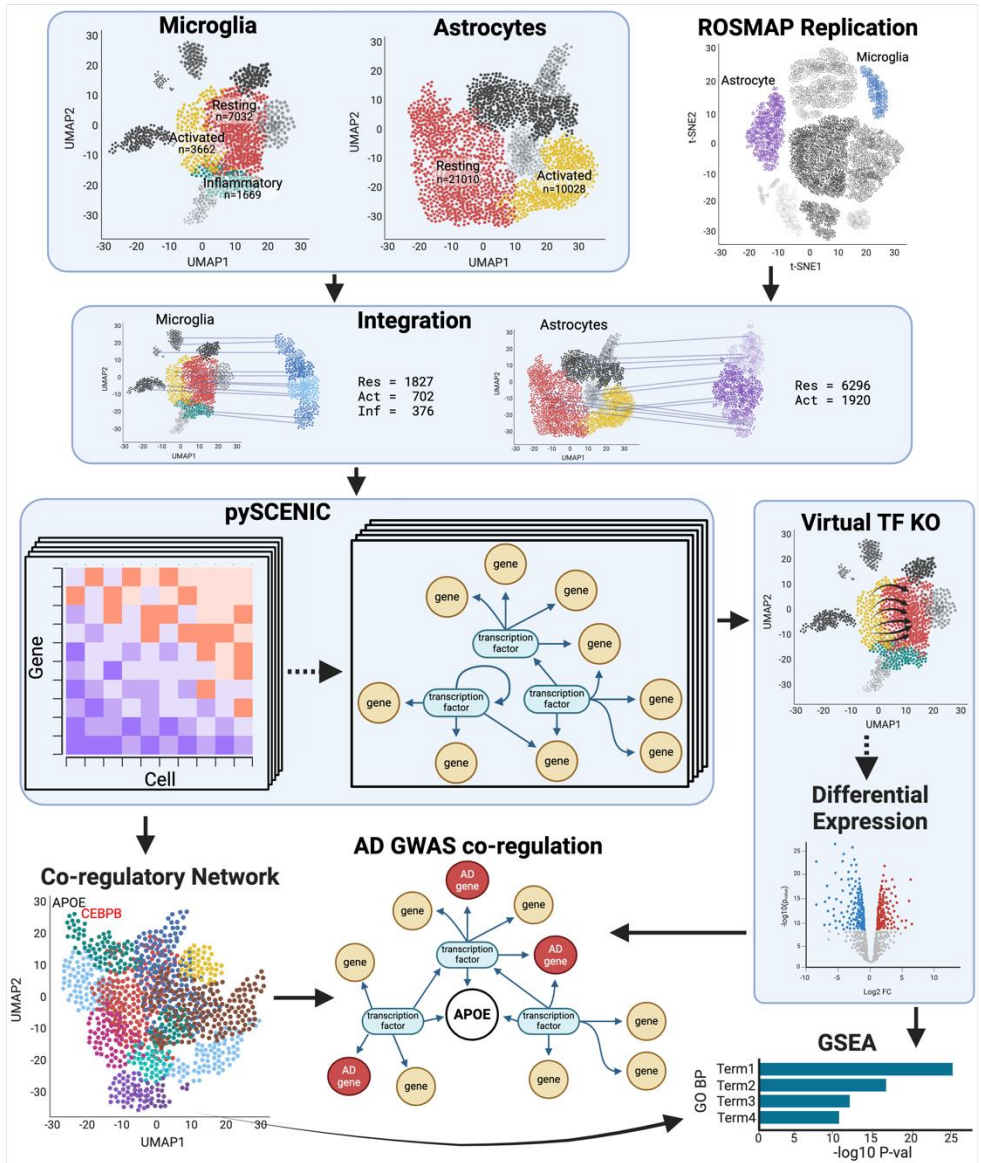

87  
 88 **Figure 1 Analysis workflow**  
 89 We extracted microglial and astrocytic cell states and ran them individually through pySCENIC to create state-specific GRNs. We  
 90 replicated the putative pySCENIC-TFs by integrating microglia and astrocytes from the ROSMAP cohort and running pySCENIC on  
 91 them. We clustered the target genes into co-regulatory networks and virtually knocked out the transcription factors (TF KO) that  
 92 regulated *APOE*. We identified genes co-regulated with *APOE* using co-regulatory network clusters and TF-KO DEGs. Both sources  
 93 of gene sets were tested for inclusion of AD GWAS genes and gene set enrichment.

94

## 95 Results

### 96 Cell-state-specific transcription factors modulating APOE expression

97 To identify the state-specific TF regulators of *APOE*, we utilized snRNA-seq data from the Knight  
98 ADRC and DIAN cohorts (parietal, n=67)<sup>5</sup>, and replicated the TFs in snRNA-seq from the  
99 ROSMAP cohort (dorsolateral prefrontal cortex, n=32)<sup>6</sup>. Focusing on microglia and astrocytes,  
100 the principal *APOE* expressors<sup>1</sup>, we isolated the resting and activated states for each cell type:  
101 mic-resting (n=7,032), mic-activated (n=3,662), mic-inflammatory (n=1,669), astro-resting  
102 (n=21,010), and astro-activated (n=10,028). We leveraged pySCENIC<sup>7</sup> to build a GRN for each  
103 state, and detected an average of 117 and 109 reproducible TF regulators for Knight and  
104 ROSMAP cohorts respectively (Supplementary Table 1). We compared the putative TFs between  
105 the cohorts and identified an average of 96 replicating regulators for each cell state (Figure 2,  
106 Supplementary Table 1). Among these, 35 TFs were shared by all five states, including *ARID3A*  
107 (*ABCA7* locus), *GABPA* (*APP* locus), and *MAF* (*WWOX* locus), which are within AD GWAS loci<sup>8</sup>  
108 (Supplementary Table 2). Moreover, 59 TFs were shared by the microglia states, including *SPI1*,  
109 *IKZF1*, *TCF3* (*KLF16* locus), and *GABPB1* (*SPPL2A* locus), which are within AD GWAS loci<sup>8,9</sup>, and  
110 69 TFs were shared by the astrocyte states including *SREBF1* (*MYO15A* locus) and *ZNF518A*  
111 (*BLNK* locus).

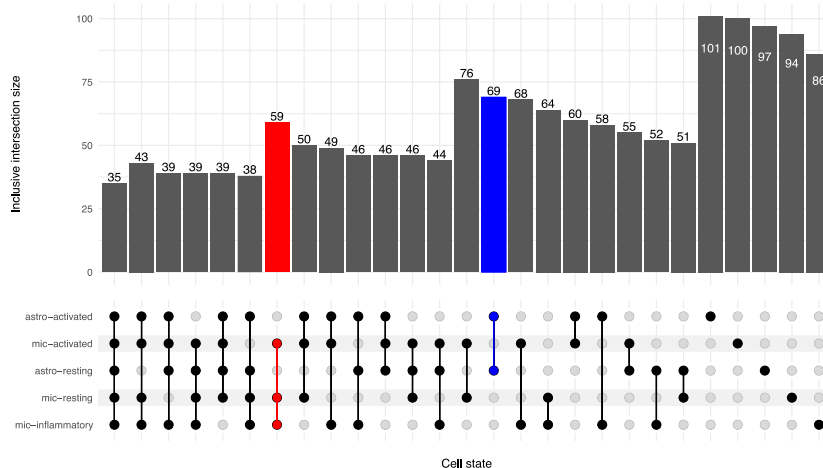

112

113 *Figure 2 Inclusive intersection of state-specific TF regulators*

114 *TF sets were identified by individually running pySCENIC on the Knight/DIAN and ROSMAP cell states and isolating the*  
115 *intersecting TFs between the discovery and replication runs (see Methods). The TF sets were then compared in an upset plot. The*  
116 *inclusive intersection indicates that all subsets are counted in the superset. For example, all 35 TFs shared between all cell states*  
117 *(the lowest subset) are counted in all other sets. The red column indicates the TFs that are common between all microglia states.*  
118 *The blue column indicates that TFs that are common between both astrocyte cell states.*

## 119 **Different TF families regulate APOE between microglia and astrocytes**

120 Next, we pinpointed the TFs regulating *APOE* in each state. In the mic-resting GRN, *APOE* was  
121 regulated by *CEBPA*, *CEBPB*, *CEBPD*, *IRF7*, and *JUND* TFs. In the mic-activated and mic-  
122 inflammatory GRNs, *APOE* was regulated by *CEBPB*, *CEBPD*, and *JUNB*, with *IRF7* also involved in  
123 the mic-activated state. In the astrocytic GRNs, *APOE* was regulated by *JUN* and *THRA* in the  
124 resting state and by *THRB* in the activated state.

125 These results highlight the CCAAT/enhancer-binding protein (CEBP) family of TFs, which form  
126 homo- and heterodimers to precisely control the expression of target genes that are primarily  
127 immune-related<sup>10</sup>. In mouse microglia cell cultures, *CEBPA* was shown to regulate homeostatic  
128 and anti-inflammatory DAM genes<sup>11</sup>, and in mouse models, *CEBPB* modulates *APOE*  
129 expression<sup>12</sup>. These findings validate pySCENIC's ability to capture known biology and lends  
130 credence to the other findings. In addition, *CEBPD* was shown to boost the expression of  
131 activation genes, including *NOS2*, *C6*, *IL1B*, and *IL6* in a BV2 microglia cell line<sup>13</sup>. Intriguingly, LPS  
132 treatment upregulates *CEBPB* and *CEBPD* while downregulating *CEBPA*, implying contrasting  
133 regulatory functions. This could account for *CEBPA*'s role as an *APOE* regulator only in mic-  
134 resting, but not in mic-activated and mic-inflammatory.

135 IRF plays a crucial role in the immune response. *IRF7* regulates type I interferon genes and *IL6*<sup>14</sup>.  
136 The JUN family proteins are known to be involved in various cellular processes, including  
137 proliferation, apoptosis, and immune response<sup>15</sup>. Their role in regulating *APOE* expression  
138 suggests a potential link between *APOE* and these cellular processes.

139 Thyroid hormone receptor family proteins, including *THRA* and *THRB*, bind to thyroid hormone,  
140 which plays a crucial role in metabolism, growth, and development. Using cell lines, *THRB* was  
141 shown to upregulate *APOE* expression in astrocytes by forming a complex with *RXRA* and  
142 binding to the multienhancer ME.2 which activates the *APOE* promoter<sup>16</sup>. Once again, this  
143 shows that pySCENIC identifies true regulatory relationships.

144 Our findings suggest that *CEBPB* and *THRB* regulate *APOE* expression in the human brain, in  
145 concordance with studies in model systems. The GRNs from pySCENIC suggest that the CEBP  
146 family primarily regulates *APOE* in microglia, while the THR family chiefly regulates expression in  
147 astrocytes. This is in line with CEBP regulating immunity genes and microglia being the primary

148 immune cells in the brain, as well as THR influencing metabolism and astrocytes being the  
149 primary support cells for neurons. This does not exclude the possibility that both families may  
150 influence *APOE* expression in both cell types.

151

### 152 **APOE-associated target genes were regulated by TFs linked to the circadian rhythm**

153 We aimed to explore those genes co-regulated with *APOE*. Thus, we built a complex co-  
154 regulatory network of genes, including all the putative TFs predicted by pySCENIC and their  
155 respective regulated genes. Then, we clustered the target genes into a UMAP space using the  
156 86-101 TFs signatures that defined each cell state. We identified an average of 27 gene clusters  
157 in each expression state (Figure 3, Supplementary Table 1). The gene clusters containing *APOE*  
158 comprised an average of 327 genes regulated by an average of 13 TFs for each cell state  
159 (Supplementary Table 1).

160 To validate these gene clusters, we isolated the TFs that significantly upregulated the gene  
161 clusters containing *APOE*, a known activated marker gene, and *CX3CR1* and *P2RY12*, known  
162 homeostatic marker genes, in the three microglia clusters. We then performed a virtual  
163 knockout (KO) of these TFs and observed the shift in the expression profile of the cells.  
164 We adapted the virtual TF knockout method described in SCENIC<sup>+17</sup> to work with pySCENIC  
165 outputs. Following the knockout of the TF, this method propagates the change through the rest  
166 of the gene expression matrix (GEM) producing a perturbed expression profile and an  
167 associated visualization of the shift in the reduced dimensionality space. The TFs regulating  
168 these homeostatic and activated marker genes should have opposite influences on microglial  
169 activation, thus opposing shifts in the expression profiles. In the mic-resting state, an individual  
170 knockout of the TFs associated with the *APOE* gene cluster generally shifted cells toward the  
171 mic-resting state, indicating these TFs are involved in maintaining an activated state. Conversely,  
172 individual knockouts of seven of the 14 TFs associated with the *CX3CR1* and *P2RY12* clusters  
173 generally pointed away from the mic-resting state, suggesting these TFs promote a resting state  
174 (Supplementary Figure 1). A similar trend was seen within mic-activated, with KO of all 17 *APOE*  
175 TFs pointing away from mic-activated and eight of the 19 TFs<sup>*CX3CR1/P2RY12+*</sup> pointing toward mic-  
176 activated (Supplementary Figure 2). This indicates that the clustering groups mirror the

177 expected biology. The mic-inflammatory cluster had no TFs significantly upregulating the  
178 *CX3CR1* or *P2RY12* clusters, so it was not explored for validation.

179 We then explored the TFs regulating *APOE* in each state. The mic-resting *APOE* cluster was  
180 regulated by *BHLHE40*, *CEBPG*, *FOS*, *FOSL2*, *GABPA*, *ILF2*, *JUN*, *JUNB*, *KMT2B*, *REL*, and *XBP1*, in  
181 addition to the TFs directly regulating *APOE* mentioned previously (Figure 3A, Supplementary  
182 Figure 4A). *BHLHE40* regulates the circadian rhythm, negatively regulates itself, *DBP* (another  
183 circadian gene), and represses RXR, a component of *APOE* activation through the THR family of  
184 TFs<sup>18-21</sup>. *BHLHE40* is located within an AD African-American GWAS locus is a key regulator for  
185 clearing lipid-rich cellular debris by lipid-associated macrophages (LAMs)<sup>8,22</sup>. *XBP1* becomes a  
186 functional TF in response to endoplasmic reticulum stress induced by unfolded proteins and is  
187 modulated by the circadian rhythm<sup>23,24</sup>. The mic-activated *APOE* cluster included *BHLHE40*,  
188 *CEBPA*, *CEBPG*, *CHD1*, *CREM*, *ETS2*, *FOS*, *FOSL2*, *FOXO1*, *FOXO3*, *JUND*, *SP3*, *SREBF1*, and *USF2*,  
189 but not *IRF7*, compared to *APOE* alone (Figure 3B, Supplementary Figure 4B). *CREM* and *SREBF1*  
190 are related to circadian rhythm and *SREBF1* is additionally related to lipid metabolism<sup>25,26</sup>.

191 Upregulation of *FOXO3* and two other TFs, was shown to move weakly inflammatory microglia  
192 to a strongly inflammatory state in a cell line<sup>27</sup>. Additionally, *FOXO3* is deactivated by *SIRT1*,  
193 another gene associated with circadian rhythm<sup>28</sup>. The mic-inflammatory *APOE* gene cluster  
194 added *CEBPA*, *E2F4*, *FOSL2*, *GABPB1*, *HDX*, *ILF2*, *IRF7*, *JUN*, *JUND*, *KMT2B*, *MAF*, *MAFG*, *NFE2L1*,  
195 *NR3C1*, *TCF7L2*, and *ZBTB40* to the *APOE* TF list (Figure 3C, Supplementary Figure 4C). *E2F4* halts  
196 the cell cycle and has been linked to cell quiescence, regulation of AD-related gene networks,  
197 and upregulation in AD brains<sup>29</sup>. Macrophage/microglia activation factor (*MAF*) expression has  
198 been linked to changes in the endosome/lysosome membranes<sup>30</sup>, which suggests a concerted  
199 action between *APOE* and endo-/lysosomal function in activated microglia. Taken together, the  
200 CEBP, FOS, and JUN families regulate the *APOE* gene clusters across microglial cell states.

201 The *APOE* clusters within astrocytes were regulated by fewer TFs than their microglial  
202 counterparts. Interestingly, astro-resting did not include either of the THR-related TFs. However  
203 it included another steroid/thyroid hormone family receptor *NR2F1*<sup>31</sup> (Figure 3D,  
204 Supplementary Figure 4D), which is associated with Bosh-Boonstra-Schaaf optic atrophy  
205 (BBSOA), optic nerve atrophy featured by the loss of retinal ganglion cells critical for the light



206 entrainment of the circadian rhythm<sup>32,33</sup>. The *APOE* cluster in astro-resting also had TFs *DBP*,  
 207 *CEBPB*, *ING4*, *JUND*, and *TBP* (Figure 3D, Supplementary Figure 4D). This supports the idea that  
 208 the CEBP family of TFs influences *APOE* in astrocytes and microglia. As previously noted, *DBP* is  
 209 related to the circadian rhythm. Astro-activated had *MAFG*, *NFIC*, *NR2F1*, *PBX1*, *POU3F2*, *RARB*,  
 210 *RFX3*, and *TCF7L1* regulating the *APOE* gene cluster in addition to *THRB* which directly regulated  
 211 *APOE* in this cell state (Figure 3E, Supplementary Figure 4E). *MAFG* has been implicated in  
 212 astrocyte-driven inflammation linked to the chronic inflammatory disease, multiple sclerosis<sup>34</sup>.  
 213 *TCF7L1* is important for astrocyte maturation, highlighting the central role that *APOE* plays in  
 214 normal astrocyte function<sup>35</sup>. *RARB* is another steroid/thyroid hormone family receptor that  
 215 forms heterodimers with RXR to facilitate transcriptional activation or repression. Despite the  
 216 absence of the THR-related TFs in astro-resting, both *APOE* gene clusters were regulated by  
 217 steroid/thyroid hormone receptors, suggesting expression regulation through thyroid hormone.  
 218 Overall, we observed that circadian rhythm-related TFs were associated with regulating the  
 219 *APOE* gene clusters across cell types and states. This implies that *APOE* participates in processes  
 220 similar to those regulated by these TFs, even if they do not directly regulate *APOE*. Alternatively,  
 221 these TFs may have a role in *APOE* regulation, but the pySCENIC analysis may lack the power to  
 222 detect them.

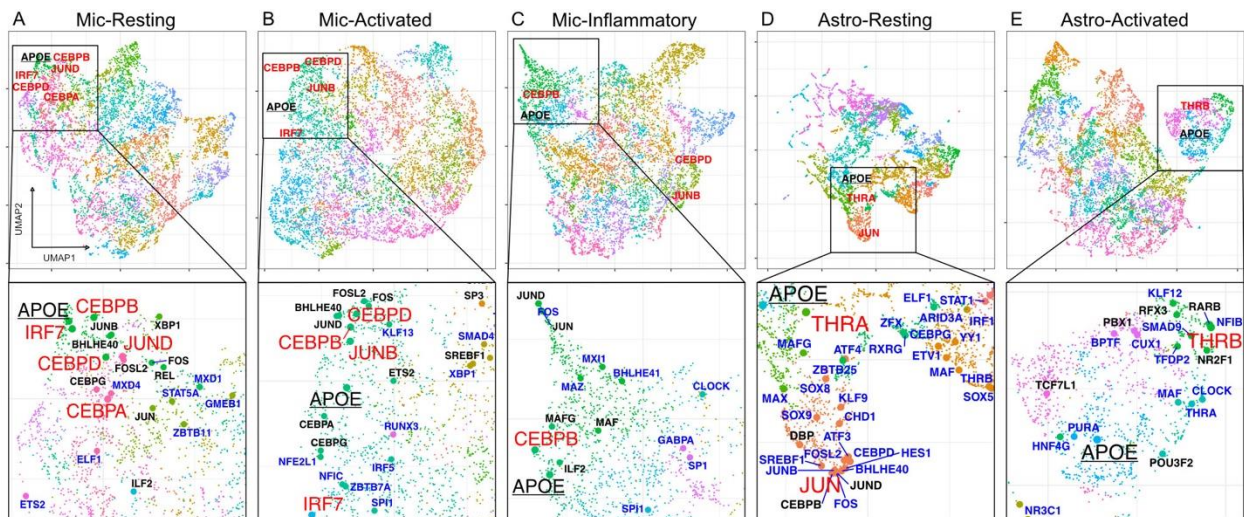

223  
 224 *Figure 3 UMAP representation of gene regulatory networks*  
 225 *A-E) A global UMAP visualization of each cell states' regulome along with a zoomed view highlighting APOE. Principle*  
 226 *component analysis was performed on the TF-by-target gene matrix. The top five principal components were used to calculate*  
 227 *the UMAP coordinates. APOE is underlined. The TFs in red directly regulate APOE. TFs in black significantly upregulate the APOE*  
 228 *gene cluster. TFs in blue are the TFs that were replicated in the ROSMAP dataset. D) The global UMAP for Astro-resting is*  
 229 *zoomed. The full figure can be found in Supplementary Figure 3.*

## 230 **Gene set enrichment of APOE gene clusters**

231 To investigate the pathways behind the genes within the *APOE* gene clusters from the co-  
232 regulatory networks, we performed an enrichment analysis using Gene Ontology (GO) biological  
233 process (BP) terms. Mic-resting showed an enrichment of pathways related to cytoplasmic  
234 translation, cytokine production, apoptotic process, integrated stress response,  
235 immunoglobulin-mediated immune response, response to lipid, IL-6 production, and response  
236 to LPS (Supplementary Figure 4F, Supplementary Table 3a). Mic-activated shared most of these  
237 pathways, but also the glycolytic process (Supplementary Figure 4F, Supplementary Table 3b),  
238 which is a metabolic feature of AD<sup>36</sup>. Mic-inflammatory had fewer pathways than the other two  
239 microglial states, but they included endocytosis, macroautophagy, and cotranslational protein  
240 targeting to the membrane (Supplementary Figure 4F, Supplementary Table 3c). These results  
241 imply that the genes in this cluster are related to the uptake and degradation of extracellular  
242 material and the replenishment of membrane proteins.

243 Astro-resting was enriched for genes in mitochondrial electron transport, NADH to ubiquinone  
244 and other aspects of the electron transport chain. It also had genes related to Golgi vesicle  
245 transport and synapse organization (Supplementary Figure 4F, Supplementary Table 3d). These  
246 results reflect the roles of astrocytes in energy metabolism and synaptic modulation. Astro-  
247 activated had many genes in its *APOE* cluster (n=409), which made the enrichment analysis less  
248 sensitive. None of the GO terms passed multiple testing correction, but the top hits (p-value <  
249 0.01) included terms such as semaphorin-plexin signaling, axon guidance, synapse assembly,  
250 fatty-acyl-CoA biosynthetic process, glucan catabolic process, and amide metabolic process  
251 (Supplementary Table 3e). Semaphorin-plexin signaling, in conjunction with axon guidance and  
252 synapse assembly, suggests an active regulation of the surrounding synapses. Glucan catabolism  
253 indicates the cell is low on glucose and tapping into glycogen reserves. Fatty-acyl-CoA  
254 biosynthesis and amide metabolism both indicate that resources are being diverted from ATP  
255 production through cellular respiration toward the synthesis of lipids like phospholipids and  
256 cholesterol for membranes and neurotransmitters, which is consistent with previous findings in  
257 AD<sup>37</sup>.

258 Overall, all microglia states were associated with immune, inflammation, and cytokine-related  
259 terms. We observed that mic-activated and astro-activated cells had genes related to known  
260 metabolic alterations in AD. We also noticed that mic-inflammatory and astro-activated cells  
261 had genes involved in endocytosis and autophagy, which are mechanisms for clearing amyloid-  
262 beta plaques and recycling other macromolecules.

263

#### 264 **Gene set enrichment of TF target genes**

265 To complement the analysis of the *APOE* gene clusters, we took a deeper dive into the TFs  
266 directly regulating APOE. Specifically, we identified the target genes significantly perturbed by a  
267 virtual knockout of these TFs. As previously described, we implemented a modified version of  
268 the TF-KO method included in SCENIC+, producing a perturbed expression profile after TF-KO.  
269 We then performed a Mann-Whitney rank-sum analysis to identify differentially expressed  
270 genes between the original and TF-KO GEMs. We found 60 to 434 nominal DEGs for each TF  
271 knockout (Supplementary Table 1, Supplementary Table 4). Using the nominal DEGs, we  
272 performed a gene set enrichment analysis and visualized the results in a heatmap to better  
273 identify patterns in the regulation of biological processes.

274 *CEBPB*-regulated processes were common across the microglial states, including positive  
275 regulation of cytokine production, receptor-mediated endocytosis, and humoral immune  
276 response mediated by circulating immunoglobulin (Figure 4, Supplementary Table 5). These  
277 processes reflect the role of *CEBPB* in modulating the inflammatory response of microglia.  
278 However, *CEBPB* also regulated processes that were specific to certain microglial states. For  
279 example, in mic-inflammatory, *CEBPB*-regulated genes are involved in mRNA splicing, via  
280 spliceosome and cellular response to lipopolysaccharide (Figure 4, Supplementary Table 5). In  
281 contrast, in mic-activated, *CEBPB* lacked the terms related to positive regulation of protein  
282 phosphorylation, positive regulation of transferase activity, antigen processing and presentation  
283 of exogenous peptide antigen, and cellular response to cytokine stimulus (Figure 4,  
284 Supplementary Table 5).

285 *CEBPD* regulated shared processes in mic-resting and -activated, but had a distinct signature in  
286 mic-inflammatory. The main divergence between the primary *CEBPB* and *CEBPD* signatures was  
287 that *CEBPD* additionally regulated fat differentiation, lipoprotein biosynthesis process, and

288 positive regulation of small molecule metabolic process (Figure 4, Supplementary Table 5). Mic-  
 289 activated *CEBPD* also regulates the lipid metabolic process. These results suggest that *CEBPD*  
 290 has a more specialized role in regulating genes related to lipid processing than *CEBPB*.

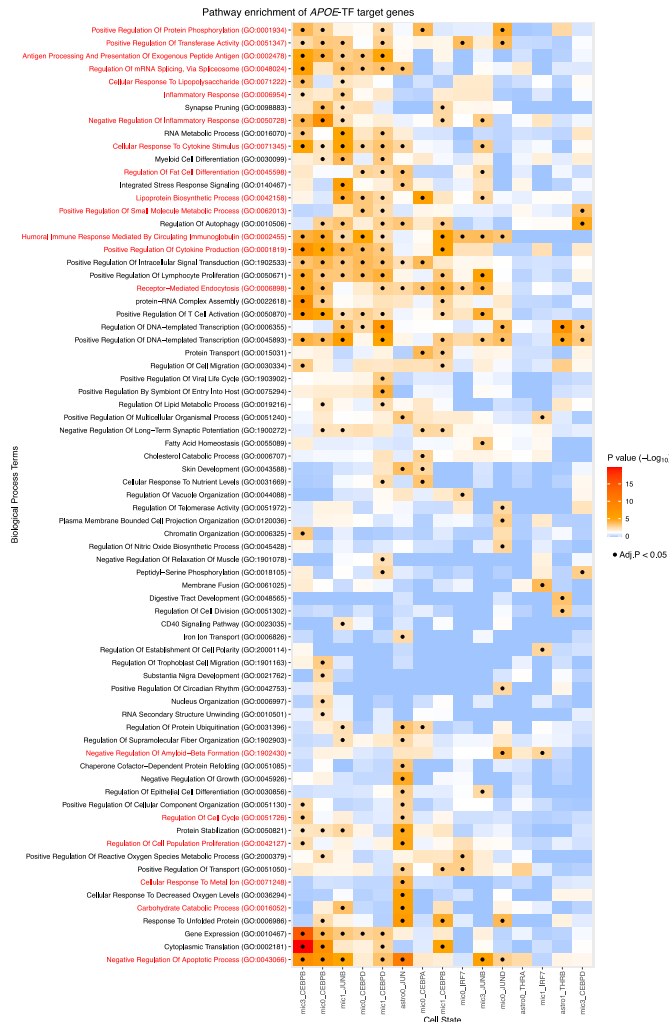

291  
 292 *Figure 4 Gene set enrichment analysis of the target genes for each cell-state-specific TF regulating APOE*  
 293 *Target genes for each TF were assessed for GO Biological Process terms. Terms were condensed using Revigo. Rows and columns*  
 294 *were sorted using hierarchical clustering on Euclidean distance. Tiles with (.) indicate significance after multiple testing*  
 295 *correction.*  
 296

297 *JUNB* regulated processes related to the immune response in mic-resting and mic-activated  
 298 states, including negative regulation of the apoptotic process, negative regulation of  
 299 inflammatory response, cellular response to cytokine stimulus, and humoral immune response  
 300 mediated by circulating immunoglobulin (Figure 4, Supplementary Table 5). Within mic-  
 301 activated, it regulated inflammatory response, cellular response to lipopolysaccharide, but also  
 302 synapse pruning and regulation of mRNA splicing, via splicesome indicating that *JUNB* regulates

303 additional processes other than immune roles in microglia. *JUND* was the regulator in mic-  
304 resting state that also regulated negative regulation of apoptotic process and humoral immune  
305 response mediated by circulating immunoglobulin, but uniquely among the JUN family, it also  
306 regulated negative regulation of amyloid-beta formation through *RIN1* and *RIN3*, which  
307 negatively regulate *BACE1*. This implies that *JUND* may be beneficial in preventing amyloid-beta  
308 accumulation in AD. Within astro-resting, *JUN* was the regulator and it had the most divergent  
309 profile, regulating processes involved in negative regulation of growth, regulation of cell cycle,  
310 regulation of cell population proliferation, cellular response to metal ion, and carbohydrate  
311 catabolic process (Figure 4, Supplementary Table 5).

312 *THRA* target genes were not enriched for any particular GO term, but *THRB*-regulated genes  
313 associated with transcription, negative regulation of inclusion body assembly, positive  
314 regulation of neurogenesis, cellular response to oxidative stress, axonogenesis, and regulation  
315 of cytokinesis (Figure 4, Supplementary Table 5). These processes suggest that *THRB* regulates  
316 genes that prepare astrocytes for activation and inflammatory response. Overall, this alternative  
317 method of examining the genes co-regulated with *APOE* revealed similar immune, lipid, and  
318 energy metabolism pathways to those of the *APOE* gene clusters, strengthening the validity of  
319 these biological pathways with *APOE*.

320

### 321 **Additional AD GWAS genes are co-regulated with *APOE***

322 The identified TFs that regulate *APOE* also regulate other genes in AD GWAS loci. Using the  
323 same set of nominal DEGs identified after the TF KO, we isolated the DEGs that intersected the  
324 list of genes within AD GWAS loci. Several of the genes are regulated by multiple *APOE* TFs  
325 including *PGRN*, *FCGR3A*, *CTSH*, *ABCA1*, *MARCKS*, *CTSB*, *SQSTM1*, *TSC22D4*, *FCER1G*, and several  
326 of the HLA genes (Figure 5A,B, Supplementary Figure 5).

327 *PGRN*, *CTSH*, and *CTSB* are all related to lysosome function and are co-regulated with *APOE* in  
328 the microglia states. *CTSB* is specifically associated with the proteolytic processing of *APP*<sup>38</sup>.  
329 *FCER1G* and *FCGR3A* are in the *ADAMTS4* locus and encode Fc immunoglobulin receptors that  
330 bind to IgE and IgG respectively. *CEBPB* regulates *FCER1G* in mic-resting and mic-inflammatory.  
331 It represses AD risk genes through the Herpes simplex (HSV-1) escape strategy<sup>39</sup>. *FCGR3A*

332 exacerbates neurodegeneration and is a potential link behind the increased AD risk in chronic  
333 periodontitis patients<sup>40,41</sup>. It is regulated in mic-resting by *CEBPB* and *IRF7*; mic-activated by  
334 *CEBPB* and *CEBPD*; and mic-inflammatory by *CEBPB*, and *JUNB*. *ABCA1* is a transporter that  
335 transfers cholesterol and other lipids to *APOE* and there is a link between *ABCA1*, *APOE*, and A $\beta$   
336 levels<sup>42</sup>. *APOE* and *ABCA1* are co-regulated in both astrocyte and microglial states. *MARCKS* is  
337 associated with lipid rafts, dissociates from the membrane at decreased concentrations of  
338 cholesterol, causing PIP2 release, and also influences inflammation<sup>43–45</sup>. *SQSTM1* (p62), found in  
339 the *RASGEF1C* locus, is also found in both astrocytes and microglia and functions as a bridge  
340 between ubiquitinated proteins and autophagosomes<sup>46</sup>. *TSC22D4* is within the *NYAP1* locus and  
341 is regulated in astro-resting by both *APOE* TFs (*THRA* and *JUN*). *TSC22D4* participates in forming  
342 a complex that degrades *BRI2* and *BRI3*, inhibitors of A $\beta$  production and aggregation.  
343 Looking at the *APOE* gene clusters, we identified genes within the *ABCA7* and *SCIMP* loci across  
344 all five cell states and four out of the five states had *HLA-DRB1*, *LILRB2*, *SIGLEC11*, *KLF16*,  
345 *DOC2A*, and *NYAP1* (Figure 5D, Supplementary Figure 5, Supplementary Figure 6). Using *SCIMP*  
346 as an example, mic-resting had gene *PFN1* within the *APOE* gene cluster; mic-activated had  
347 *CXCL16* and *PFN1*; mic-inflammatory had *CXCL16*; astro-resting had *SLC25A11*; and astro-  
348 activated had *RABEP1* (Figure 5C). Interestingly, *PFN1* is related to amyotrophic lateral sclerosis  
349 (ALS), action polymerization, and binding of PIP2<sup>47,48</sup>, which could connect it to *MARCKS* and,  
350 therefore membrane cholesterol concentrations as mentioned above. *CXCL16* induces a  
351 chemokine-induced chemotactic response, *SLC25A11* maintains the organization and  
352 morphology of the mitochondrial cristae<sup>49</sup>, and *RABEP1* is involved in endocytic membrane  
353 fusion and recycling of endosomes, all of which connect to AD biology. Genes in AD loci *CD33*  
354 and *APH1B* were exclusively found in both astrocyte states (Figure 5D). *LACTB* (*APH1B* locus)  
355 was co-regulated with *APOE* in astro-resting (Figure 5C) and regulated mitochondrial lipid  
356 metabolism<sup>50</sup>. *TLN2* (*APH1B* locus) was co-regulated in astro-activated (Figure 5C) and is a  
357 component of the actin cytoskeleton linking to focal adhesion plaques, which have been shown  
358 to have higher concentrations of cholesterol than the surrounding membrane<sup>51</sup>. Even though  
359 the genes were not necessarily the same across the cell states, the consistency of genes within

360 these loci clustering with *APOE*, and many relating to lipid metabolism, suggests common  
 361 regulatory mechanisms behind these loci and *APOE*.  
 362 These findings suggest that the regulatory networks involving *APOE* and the identified  
 363 transcription factors extend beyond *APOE* itself and involve other genes associated with AD.  
 364 Many of these AD-GWAS genes are related to critical immune, lysosome, lipid, and energy  
 365 metabolism pathways highlighted by the previous TF and gene set enrichment analyses. It also  
 366 supports the notion that some GWAS loci have many genes that can simultaneously influence  
 367 AD risk.

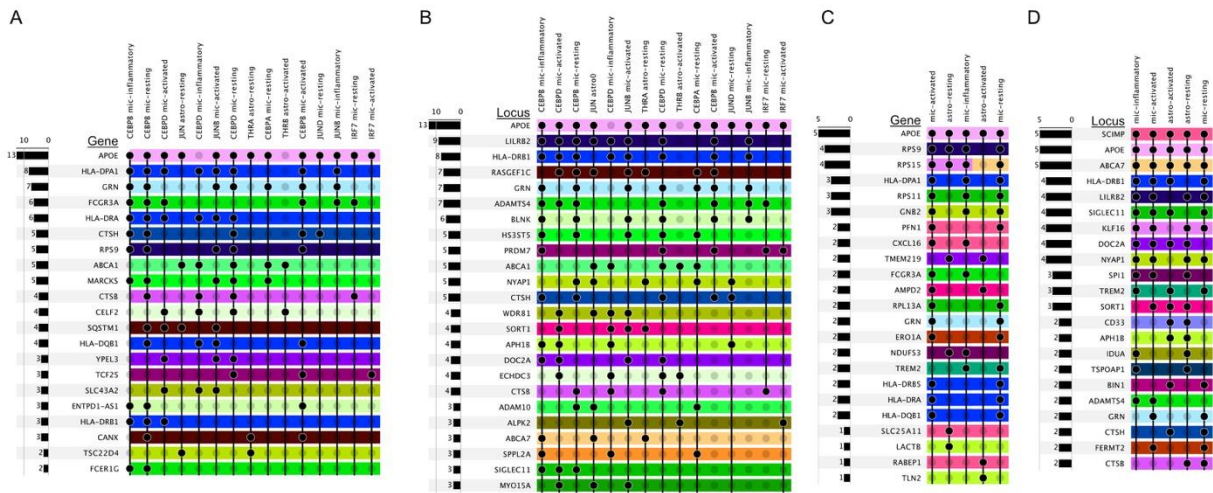

368  
 369 *Figure 5 Other AD GWAS genes are coregulated with APOE*  
 370 (A,B) Genes (A) in AD GWAS loci (B) that are co-regulated by *APOE*-regulating TFs. Genes co-regulated by *APOE*-TFs were those  
 371 differentially expressed (Mann-Whitney Rank U) between the original expression profiles and the perturbed values following  
 372 virtual TF-KO. (C,D) Genes (C) in AD GWAS loci (D) that co-clustered with *APOE* in the co-regulation networks. Principle  
 373 component analysis was performed on the TF-by-target gene matrix. The top five principal components were used to calculate  
 374 the UMAP coordinates. Gene clusters were calculated from a shared-nearest-neighbor graph using the Louvain algorithm. Rows  
 375 are colored by loci. Some genes are within two loci and therefore have two colors. These plots are truncated; the full plots can be  
 376 found in Supplementary Figure 6.

377

## 378 Discussion

379 We used GRNs to elucidate the cell-type- and -state-specific regulation of *APOE*. These analyses  
380 revealed that *APOE* and its co-regulated genes were modulated by several transcription factor  
381 (TF) families, including CEBP, JUN, FOS, FOXO, and THR. The CEBP (A/B/D/B), JUN (/B/D), and  
382 FOS (/L2) families were involved in *APOE* regulation in all microglial states, whereas FOXO (1/3)  
383 was specific to the mic-inflammatory state. Despite the consistency of the CEBP, JUN, and FOS  
384 families across microglial states, the individual members had different strengths and  
385 associations based on cell state suggesting individual TFs could more strongly promote one state  
386 over another. The CEBP family of TFs form homo- and heterodimers with each other, so the  
387 proportions of these dimers could influence cell state. Additional experimental studies are  
388 needed to better understand the interplay between members of these families and how they  
389 regulate the activation states of microglia. Interestingly, *CEBPB* and *JUND* also regulated the  
390 *APOE* gene cluster in the astro-resting state, suggesting that these TF families play a role in  
391 *APOE* regulation in both microglia and astrocytes. *APOE* in astro-activated was controlled by the  
392 known *APOE* regulator *THRB*<sup>16</sup>, and *NR2F1* and *RARB*, two other members of the steroid/thyroid  
393 hormone receptor family. We previously reported an upregulation of *THRB* in the mic-activated  
394 state compared to the other microglia states, implying that the THR family of TFs could  
395 influence *APOE* expression in microglia as well, but to a lower degree<sup>5</sup>. Further studies are  
396 required to confirm this conclusion.

397 These GRNs identified associations with immunoglobulin binding, IL1B/IL6/cytokine production,  
398 glycolysis, endocytosis, macroautophagy, mitochondrial electron transport, fatty-acyl-CoA  
399 biosynthesis, glucan catabolism, and amide metabolism. Related to immunoglobulin binding, AD  
400 GWAS associated genes *FCER1G*, *FCGR2A*, and *FCGR3A* are Fc immunoglobulin receptors that  
401 bind to IgE and IgG and were coregulated with *APOE* in microglia. Usually, IgE and IgG cannot  
402 cross the blood-brain-barrier (BBB), but it has been suggested that in *APOE*e4 carriers, the  
403 vasculature and endothelial cells making up the BBB are compromised, and albumin, antibodies,  
404 cytokines, and other inflammatory molecules more easily cross into the brain<sup>52,53</sup>. This might  
405 account for the association between this biology and *APOE*. It might also explain how  
406 periodontitis, a peripheral infection, could increase AD risk in association with *FCGR3A*<sup>41</sup>.



407 Additionally, when microglia and astrocytes encounter these inflammatory signals, they  
408 propagate the signal by producing their own *IL1B*, *IL6*, and other cytokines, as suggested by  
409 these GRNs<sup>54–56</sup>. Astrocytes also boost their cholesterol production in response to cytokine  
410 signaling<sup>53</sup>. Within astro-activated, we saw many *APOE*-related genes pointing to fatty-acyl-CoA  
411 biosynthesis, a precursor to cholesterol. *APOE* is one of the key molecules transporting this  
412 newly synthesized cholesterol to the surrounding cells. Evidence indicates that increases in  
413 cholesteryl ester, the storage molecule for excess cholesterol, increase the accumulation of  
414 phosphorylated tau (pTau) by reducing the proteasome protein units<sup>57,58</sup>. Studies have also  
415 suggested that this increased cholesterol enlarges the lipid rafts, influencing many associated  
416 receptors<sup>53,59,60</sup>. For instance, *APP*, *BACE1*, *TREM2*, *MS4A*, *TLR4*, Fc immunoglobulin receptors,  
417 and *GLUT1* are all associated with lipid rafts<sup>53,59–61</sup>. Our analysis shows that other AD GWAS  
418 genes are co-regulated with *APOE*; some are also associated with cholesterol levels in the  
419 membrane, including *MARCKS*, *PRN1*, and *TLN2*. In neurons, *APP* is upregulated and  
420 preferentially beta-cleaved when associated with lipid rafts which is amyloidogenic<sup>59,60</sup>. *TREM2*,  
421 *TLR4*, *IFNGR*, and *TNFA* are all receptors that rely upon clustering as a part of their activation<sup>53</sup>,  
422 and increased cholesterol mediates this clustering, enhancing the activation of these cells, again  
423 highlighting the connection between cytokines and the *APOE*-related genes. Astrocytes are the  
424 primary support cells of the brain and are in contact with the vasculature to facilitate the uptake  
425 and delivery of essential molecules to the neurons and other cells. *GLUT1* transports glucose  
426 into astrocytes through the endfeet, but evidence suggests that *GLUT1* is less efficient when  
427 incorporated into large lipid rafts induced by increased cholesterol<sup>62,63</sup>. This might explain why  
428 the mitochondrial electron transport chain is associate with astro-resting, while glucan  
429 catabolism, or the breakdown of glycogen into glucose, is linked to astro-activated state. Other  
430 studies have reported a reduction in glucose uptake in AD<sup>36</sup>. Interestingly, while extra  
431 cholesterol decreases glucose uptake, it increases neuronal energy demand by promoting  
432 neurotransmitter release in presynapses and the endocytosis and internalization of receptors in  
433 postsynapses<sup>64</sup>. This energy demand stimulates the transport of lactate and ketones from  
434 astrocytes to neurons, enabling increased neural activation by bypassing the rate-limiting step  
435 of glycolysis in energy production<sup>36,65</sup>. Evidence shows that in young *APOE*e4 carriers, there is an

436 increase in cognitive performance and neuronal activity, suggesting this biology is  
437 occurring<sup>36,66,67</sup>. With age we see the negative aspects of this increased neuronal activity.  
438 Neuronal activity produces reactive oxygen species (ROS), so these hyperactive neurons  
439 produce increased quantities of ROS which then peroxidate the fatty acids (pFA) found in the  
440 cell and organelle membranes<sup>68</sup>. These pFA are toxic, so the neurons expel them with the help  
441 of *APOE*. Over time, ROS and pFA build up in the neuron, causing neurotoxicity, especially in  
442 *APOEε4* carriers with less efficient binding and, therefore, export of lipids. The expelled pFA is  
443 then picked up by microglia and astrocytes and stored in lipid droplets (LD), which is consistent  
444 with our finding GO terms, TFs (*MAF* and *CEBPB*), and GWAS genes (*RABEP1*) related to  
445 endocytosis. This is also concordant with our finding that *BHLHE40*, a regulator for the clearance  
446 of lipid-rich cellular debris, is an *APOE* regulator. Excess cholesterol produced by astrocytes also  
447 collects in the lysosome, where it causes lysosomal dysfunction, leading to the buildup of  
448 autophagosomes and mitochondrial dysfunction<sup>36</sup>. This is consistent with many of the co-  
449 regulated GWAS genes we identified, including *PGRN*, *CTSH*, *CTSB* (lysosome), *SQSTM1*  
450 (autophagosomes), *SLC25A11*, and *LACTB* (mitochondria metabolism).

451 Our findings also show that many TFs regulating *APOE* and the *APOE* gene clusters are related to  
452 circadian rhythm, including *BHLHE40*, *DBP*, *XBP1*, *CREM*, *SREBF1*, *FOXO3*, and *NR2F1*. This is  
453 consistent with many studies that have reported an association between AD and disrupted  
454 sleep due to circadian rhythm dysfunction<sup>33,66,69–71</sup>. These findings highlight the importance of  
455 the circadian rhythm in regulating *APOE* expression and function. Interestingly, *NR2F1* is  
456 associated with BBSOA, a neurodevelopmental disease characterized by the loss of retinal  
457 ganglion cells<sup>32</sup>. Another study with *APOE<sup>-/-</sup>* reported the loss of melanopsin-expressing ganglion  
458 cells in the suprachiasmatic nucleus, resulting in the loss of light entrainment<sup>33</sup>, the process by  
459 which light synchronizes the biological clock with the environment. These studies suggest that  
460 *NR2F1* and *APOE* are connected and involved in the circadian rhythm, as indicated by our GRNs.  
461 Furthermore, the disruption of energy metabolism and the suggested increase in ketone  
462 metabolism are modulated by *AMPK*<sup>72</sup>. *AMPK* also degrades the circadian proteins *Per* and *Cry*,  
463 which are produced by the transcriptional activation of *Clock* and *Bmal1*<sup>73</sup>. *Per* and *Cry* form a  
464 complex with *CK1E/D* and inhibit the transcription of *Clock*, *Bmal1*, *Per*, and *Cry*, creating a

465 negative feedback loop. The degradation of *Per* and *Cry* by *AMPK* breaks this loop and results in  
466 the overexpression of *Clock* and *Bmal1*, as well as their downstream targets, such as *NR1D1*,  
467 which encodes the Rev-ERB $\alpha$  protein. *NR1D1* represses *Cx3cr1*, a marker of homeostatic  
468 microglia, thus activating microglia and influencing lipid droplet formation<sup>74,75</sup>. Disruption of the  
469 circadian rhythm is associated with impaired function and integrity of the endothelial and  
470 vascular smooth muscle cells, causing inflammation and passing these inflammatory markers  
471 through a weakened BBB<sup>73</sup>. It is also related to energy metabolism during the fasting stage of  
472 sleep<sup>26</sup>. Overall, our results reemphasize the connection of AD to circadian rhythm and suggest  
473 that *APOE* and lipid biology are key contributors.

474 In general, the TF families primarily associated with microglia suggest a relationship between  
475 immunity and *APOE*, while the TF family associated with astrocytes suggests a link between  
476 *APOE* and lipid metabolism. This is consistent with the primary function of each of these cell  
477 types. In astrocytes, the evidence points to the primary purpose of *APOE* in lipid metabolism is  
478 to shuttle cholesterol and other lipids synthesized by the astrocytes to other cells. The primary  
479 purpose of *APOE* in immunity is not quite as clear in microglia. A promising possibility is the  
480 secretion of extracellular vesicles (EVs) that are induced upon microglial activation. The biology  
481 related to these EVs is closely tied with that of the endosomal-lysosomal system<sup>76</sup>, highlighted  
482 in our GRNs. These EVs can contain RNA, protein, lipids, and cytokines for extracellular  
483 communication<sup>77</sup>. A study in *Apoe*<sup>-/-</sup> mice on a high-fat diet highlighted the role of *Apoe* in  
484 influencing the miRNA composition of EVs secreted by these macrophages and their impact on  
485 atherosclerosis<sup>78</sup>. Although most studies on EVs interrogate their miRNA composition, other  
486 studies suggest differences in lipid composition based on microglia state as well<sup>79</sup>, including  
487 increased secretion of cholesterol in EVs in response to increased free cholesterol<sup>80</sup>. *APOE* could  
488 play a role in the transfer of lipids to these EVs.

489 A limitation of this study is that pySCENIC utilizes only a single modality, co-expression, to  
490 identify relationships between TFs and target genes, unlike the newer SCENIC+, which also  
491 incorporates chromatin accessibility. Despite this, pySCENIC has successfully identified  
492 biologically relevant TF-target interactions. We presume that TFs regulating the *APOE* gene  
493 clusters within the co-regulatory networks influence *APOE*, even in the absence of direct TF-

494 *APOE* links in the pySCENIC results. Nevertheless, the findings underscore many known features  
495 of AD and establish a link to *APOE* biology. Moreover, the discovery cohort includes carriers of  
496 *APOE*, *TREM2*, *APP*, and *PSEN1* variants, all of which could influence the GRNs in ways not  
497 accounted for. Additionally, the cohort's European ancestry may restrict the generalizability of  
498 these results to other, less represented populations.

499 In conclusion, the TFs and pathways associated with *APOE* all support known AD pathology and  
500 support the building evidence implicating lipids as a key driver of AD-related pathology.

501

## 502 Methods

### 503 Single nucleus RNA-seq acquisition and integration

504 Human snRNA-seq data of the parietal lobe from the Knight ADRC and DIAN was gathered at  
505 NIAGADs (accession number [NG00108](#)) and upon request from DIAN. These data include a total  
506 of 67 neuropathological controls, sporadic AD, and autosomal dominant AD participants.  
507 An independent human snRNA-seq dataset from ROSMAP (dorsolateral prefrontal cortex) was  
508 collected from Synapse (synapse ID [syn21125841](#)). The ROSMAP data has 11 sporadic AD,  
509 11 *TREM2* R62H, and 10 control participants. The microglia from the ROSMAP dataset was  
510 previously integrated with the microglia from the Knight and DIAN data<sup>5</sup>. The ROSMAP  
511 astrocytes were integrated as a part of this study using the same process described by Brase, *et*  
512 *al.* Briefly, we isolated and normalized the astrocytes with Seurat's (v.4.3.0) *SCTransform*, setting  
513 "return.only.var.genes" to FALSE and regressing out "nCount\_RNA" and "nFeature\_RNA". We  
514 integrated the astrocytes with 3000 features in *SelectIntegrationFeatures*, *PrepSCTintegration*,  
515 our data as reference in *FindIntegrationAnchors*, and *IntegrateData*. We clustered integrated  
516 data with ten principal components in *FindNeighbors* and resolution 15 in *FindClusters*. We gave  
517 each cluster an 'original' identity by isolating our nuclei from clusters and finding the most  
518 common original ID. We transferred this ID to ROSMAP nuclei like a k-nearest neighbor classifier.  
519 We mapped cluster identities to pre-integrated normalized ROSMAP data.

520

### 521 Gene regulatory network prediction by pySCENIC

522 We created cell-state-specific GRNs using the python implementation of the SCENIC<sup>81</sup> analysis  
523 method called pySCENIC<sup>7</sup> (version 0.12.1). We isolated the cell type of interest and filtered the  
524 genes to those that were expressed in  $\geq 5\%$  of the cell type population. Then we isolated the cell  
525 expression states of interest. We ran pySCENIC on each individual cell state 100 times (different  
526 seed for each run) as suggested by pySCENIC. We employed default values for all parameters  
527 and provided default reference data downloaded from <https://resources.aertslab.org/cistarget/>:  
528 Database (hg38\_500bp\_up\_100bp\_down\_full\_tx\_v10\_clust.genes\_vs\_motifs.rankings,  
529 hg38\_10kbp\_up\_10kbp\_down\_full\_tx\_v10\_clust.genes\_vs\_motifs.rankings), table (motifs-  
530 v10nr\_clust-nr.hgnc-m0.001-o0.0.tbl), and transcription factor list (allTFs\_hg38.txt). An

531 additional TF list was downloaded  
532 from [http://humantfs.cabr.utoronto.ca/download/v\\_1.01/TF\\_names\\_v\\_1.01.txt](http://humantfs.cabr.utoronto.ca/download/v_1.01/TF_names_v_1.01.txt) and the two  
533 lists were merged totaling 2093 TFs.

534 After the 100 runs were complete, we identified the transcription factors (TFs) that were  
535 present in  $\geq 80\%$  of the runs. We then ran pySCENIC an additional 100 times using only the  
536  $\geq 80\%$  TFs labeled as transcription factors. The other TFs were retained in the expression  
537 matrix, but not labelled as TFs. The TFs that appeared in  $\geq 80\%$  of the second round of runs  
538 were isolated as reproducible regulators.

539 The same resource files and parameters were used in the ROSMAP cohort replication. We  
540 filtered the genes to those intersecting those from the Knight ADRC microglia and astrocyte  
541 runs. We ran pySCENIC 100 times using the filtered list of TFs for each respective cell state (list  
542 used in second round of discovery runs). We isolated the TFs that were present in  $\geq 50\%$  of the  
543 runs. We intersected the final lists of discovery TFs with the lists of replication TFs to identify a  
544 set of replicable TFs for each cell state.

545

#### 546 **Co-regulation network clusters**

547 Using the TF-target gene matrices for cell state, we identified co-regulation network clusters and  
548 visualized them in the UMAP space. The TF-target gene matrix had each of the replicable TFs as  
549 features, the target genes as elements, and the values were the number of times the target  
550 gene was regulated by the TF out of the 100 pySCENIC runs. These values were normalized by  
551 the number of times the TF was included in the pySCENIC networks. For example, if TF\_1 was in  
552 the pySCENIC networks 85 times, all the values would be multiplied by  $(100/85)$  to get the  
553 normalized value. We then log transformed the values and ran them through a principal  
554 component analysis using *prcomp*, a native R (v4.2.2) function. We then passed the top five  
555 principal components (PCs) through the *umap* function from the umap library (v0.2.10.0) to  
556 create a two-dimensional representation of the space. The top five PCs were also passed to the  
557 *makeSNNGraph* function from the bluster package (v1.8.0) to create a shared nearest neighbor  
558 graph. The resulting graph was passed to the *cluster\_louvain* function from the igraph package  
559 (v1.3.5) to identify clusters of similarly regulated target genes using a resolution of 2. All target

560 genes in the same cluster as APOE were considered co-regulated with APOE and were evaluated  
561 for additional AD GWAS genes and for gene set enrichment (Supplementary Table 6).

562

### 563 **TF regulators for gene clusters**

564 We identified the TFs significantly upregulating the genes in each gene cluster identified in the  
565 gene UMAPs. We utilized the normalized, but not log transformed, TF-target gene matrix  
566 described in the Gene UMAP clusters section. For each gene cluster at a time, we created a  
567 binary vector where 1 indicated the target gene was in the cluster. We then looped through  
568 each TF and modelled the TF-target gene values using the binary vector as a covariate. The  
569 native *glm* R function (v4.2.2) was used to train the model with a quasipoisson distribution and  
570 log link function. The hits for each cluster were then multiple testing corrected using the  
571 Benjamini-Hochberg (BH) method. TFs with a BH corrected p-value less than 0.05 and an  
572 estimate greater than zero were considered significant regulators for the gene cluster.

573

### 574 **In silico transcription factor knock-out**

575 SCENIC+<sup>17</sup> was recently released with the functionality to knockout a TF and determine the shift  
576 in the expression space. We implemented the algorithm proposed in SCENIC+ (v1.0.0, python  
577 v3.8.18), which was an adaption from the original method in CellOracle<sup>82</sup>. In summary, this  
578 method uses the cell by gene expression matrix to train prediction models for each gene. These  
579 models allow for the virtual knockout of a TF (TF-KO) by setting the expression of the TF to zero  
580 and then using the trained models to predict the shift in target gene expression. The expression  
581 shift is then transformed back onto the reduction space and depicted by arrows.

582 By default, SCENIC+ used the GradientBoostingRegressor from sklearn (v1.3.2) with a learning  
583 rate of 0.01, 500 estimators, and max features set to 0.1 to train prediction models. We included  
584 the TFs that were regulating a target gene at least 5% of the time in the model that used TF  
585 expression to predict the target gene expression. To correct for the influence of sample  
586 proportion on each cell state, we also included the log transformed nuclei counts for the sample  
587 in the prediction model. SCENIC+ uses a default of five iterations to propagate the shift across  
588 the expression matrix. We extended SCENIC+'s implementation to work with the UMAP space  
589 rather than just the PCA space. We also switched the arrows to be drawn by the quiver function

590 as was found in the CellOracle implementation rather than the streamplot function used by  
591 SCENIC+.

592 To extend this method to the UMAP space, we trained a neural network to predict a cell's UMAP  
593 coordinates using as input the expression levels of all genes (python v3.11.0). We used the  
594 original gene expression matrix (GEM) and UMAP representation for the cell types which  
595 included all expression states not just the resting and activated states passed to pySCENIC. First,  
596 we log transformed the GEM. We then used the *train\_test\_split* function from sklearn (v1.3.2)  
597 to split the data into training and testing data (80% training, 20% testing) and stratified by cell  
598 state. We then split the training data into training and validation sets (90% training, 10%  
599 validation) and once again stratified by cell state. Using the *StandardScaler* function from  
600 sklearn (v1.3.2) we fit and transformed a scaler using the training GEM. This scaler was then  
601 used to transform the validation and test GEMs. The sequential neural network was constructed  
602 using tensorflow (v2.14.0) and consisted of three layers: two dense layers with the ReLU  
603 activation function and an output layer with the same dimensionality as the UMAP data (n=2).  
604 The model was compiled with the Adam optimizer and mean squared error loss function. Early  
605 stopping was implemented to prevent overfitting with monitoring set to 'val\_loss' and a  
606 patience of 10. The model was then trained on the training data for a maximum of 1000 epochs.  
607 The trained model was evaluated on the test GEM. This trained model was used on the TF-KO  
608 perturbed matrices to transform the expression shift to the UMAP reduction space. This  
609 method was incorporated into a snakemake pipeline so that TF-KO could be performed  
610 consistently across TFs, cell states, and cell types.

611

### 612 **TF knockout differential expression**

613 We performed a differential expression analysis between the original GEM and perturbed GEM  
614 calculated after TF-KO. The original GEM and perturbed GEM were both log transformed. We  
615 then filtered out the cells that had zero expression of the TF in the original matrix as these cells  
616 have no changes in expression and would skew the results. We then performed a Mann-  
617 Whitney rank U test using the *mannwhitneyu* function from scipy (v1.2.2, python v3.11.0) to  
618 identify differentially expressed genes. We performed FDR multiple testing correction. Genes



619 with a corrected p-value less than 0.05 were considered co-regulated with APOE and were  
620 evaluated for additional AD GWAS genes and for gene set enrichment (Supplementary Table 6).  
621

### 622 **Gene set enrichment of genes co-regulated with APOE**

623 Sets of co-regulated genes were run through enrichment analysis to better understand the  
624 related function. There were two sources of co-regulated genes, co-regulation network clusters  
625 and TF-targets, and they were analyzed independently. The gene sets identified by gene clusters  
626 were run through enrichment analysis using the *enrichr* function from the *enrichR* package  
627 (v3.1) in R (v4.2.2) and the TF-targets were run through the *enrichr* function from the *gseapy*  
628 package (v0.9.5) in python (v3.11.0). Both used the 2023 GO Biological Process (BP) terms and  
629 significant associations were those with adjusted p-values less than 0.05.

630 The terms from the TF-targets analysis were condensed using *rrvgo* (v1.6.0), an R package that  
631 implements the Revigo<sup>83</sup> tool for summarizing GO BP terms. The function *calculateSimMatrix*  
632 was used to calculate the relationships between the GO BP terms with variable inputs:  
633 `orgdb = "org.Hs.eg.db", ont = "BP", method = "Rel"`. The terms were then summarized using  
634 *reduceSimMatrix* and the following variables: `score = "Rank", threshold = .7,`  
635 `orgdb = "org.Hs.eg.db"`. The summarized terms or "parentTerms" and their P values were then  
636 used to make a heatmap. Rows and columns were ordered using `dist` function  
637 `method = "manhattan"`.

### 638 **Identifying other AD GWAS genes co-regulated APOE**

639 There were two sources of co-regulated genes, co-regulation network clusters and TF-targets,  
640 and they were analyzed independently. These gene sets were compared against a list of genes  
641 within GWAS loci (+/- 500KB of the lead SNP, Supplementary Table 7) and can be found in  
642 Supplementary Table 6. The Loci for each source were identified and merged. This merged list  
643 was used to consistently color the genes and loci for each row in the upset plots in Figure 5.

### 644 **Data Availability**

645 The single nucleus data from the Knight ADRC accessed in this study are found in the National  
646 Institute on Aging Genetics of Alzheimer's Disease Data Storage Site (NIAGADS) with accession  
647 number NG00108 [<https://www.niagads.org/datasets/ng00108>]. The raw single nucleus data

648 from the DIAN brain bank accessed in this study are available under restricted access to  
649 maintain individual and family confidentiality. These samples contain rare disease-causing  
650 variants that could be used to identify the participating individuals and families. Access can be  
651 obtained by request through the online resource request system on the DIAN Website:  
652 [https://dian.wustl.edu/our-research/for-investigators/dian-observational-study-investigator-](https://dian.wustl.edu/our-research/for-investigators/dian-observational-study-investigator-resources/)  
653 [resources/](https://dian.wustl.edu/our-research/for-investigators/dian-observational-study-investigator-resources/). The ROSMAP single nucleus RNA sequencing data used in this study are available at  
654 Synapse under Synapse ID syn21125841  
655 [<https://www.synapse.org/#!Synapse:syn21125841/wiki/597278>]. The pySCENIC default  
656 reference data was downloaded from <https://resources.aertslab.org/cistarget/>: Database  
657 [[https://resources.aertslab.org/cistarget/databases/homo\\_sapiens/hg38/refseq\\_r80/mc\\_v10\\_cl-](https://resources.aertslab.org/cistarget/databases/homo_sapiens/hg38/refseq_r80/mc_v10_clust/gene_based/hg38_500bp_up_100bp_down_full_tx_v10_clust.genes_vs_motifs.rankings.feather)  
658 [ust/gene\\_based/hg38\\_500bp\\_up\\_100bp\\_down\\_full\\_tx\\_v10\\_clust.genes\\_vs\\_motifs.rankings.fe-](https://resources.aertslab.org/cistarget/databases/homo_sapiens/hg38/refseq_r80/mc_v10_clust/gene_based/hg38_500bp_up_100bp_down_full_tx_v10_clust.genes_vs_motifs.rankings.feather)  
659 [ther](https://resources.aertslab.org/cistarget/databases/homo_sapiens/hg38/refseq_r80/mc_v10_clust/gene_based/hg38_500bp_up_100bp_down_full_tx_v10_clust.genes_vs_motifs.rankings.feather)],  
660 [[https://resources.aertslab.org/cistarget/databases/homo\\_sapiens/hg38/refseq\\_r80/mc\\_v10\\_cl-](https://resources.aertslab.org/cistarget/databases/homo_sapiens/hg38/refseq_r80/mc_v10_clust/gene_based/hg38_10kbp_up_10kbp_down_full_tx_v10_clust.genes_vs_motifs.rankings.feather)  
661 [ust/gene\\_based/hg38\\_10kbp\\_up\\_10kbp\\_down\\_full\\_tx\\_v10\\_clust.genes\\_vs\\_motifs.rankings.fe-](https://resources.aertslab.org/cistarget/databases/homo_sapiens/hg38/refseq_r80/mc_v10_clust/gene_based/hg38_10kbp_up_10kbp_down_full_tx_v10_clust.genes_vs_motifs.rankings.feather)  
662 [ther](https://resources.aertslab.org/cistarget/databases/homo_sapiens/hg38/refseq_r80/mc_v10_clust/gene_based/hg38_10kbp_up_10kbp_down_full_tx_v10_clust.genes_vs_motifs.rankings.feather)], table [[https://resources.aertslab.org/cistarget/motif2tf/motifs-v10nr\\_clust-nr.hgnc-](https://resources.aertslab.org/cistarget/motif2tf/motifs-v10nr_clust-nr.hgnc-m0.001-o0.0.tbl)  
663 [m0.001-o0.0.tbl](https://resources.aertslab.org/cistarget/motif2tf/motifs-v10nr_clust-nr.hgnc-m0.001-o0.0.tbl)], and transcription factor list  
664 [[https://resources.aertslab.org/cistarget/tf\\_lists/allTFs\\_hg38.txt](https://resources.aertslab.org/cistarget/tf_lists/allTFs_hg38.txt)]. An additional TF list was  
665 downloaded from [[http://humantfs.cabr.utoronto.ca/download/v\\_1.01/TF\\_names\\_v\\_1.01.txt](http://humantfs.cabr.utoronto.ca/download/v_1.01/TF_names_v_1.01.txt)].  
666 Source data are provided with this paper.

## 667 Code Availability

668 Custom code used to analyze the snRNA-seq data and datasets generated and/or analyzed in  
669 the current study are available from the corresponding authors upon request or at  
670 <https://github.com/HarariLab/APOE-GRN>.

671

672

673   **References**

- 674   1. Ulrich, J. D. *et al.* ApoE facilitates the microglial response to amyloid plaque pathology. *J.*  
675       *Exp. Med.* **215**, 1047–1058 (2018).
- 676   2. Singh, D. Astrocytic and microglial cells as the modulators of neuroinflammation in  
677       Alzheimer’s disease. *J. Neuroinflammation* **19**, 206 (2022).
- 678   3. Eskandari-Sedighi, G. & Blurton-Jones, M. Microglial APOE4: more is less and less is more.  
679       *Mol. Neurodegener.* **18**, 99 (2023).
- 680   4. Fernandez, C. G., Hamby, M. E., McReynolds, M. L. & Ray, W. J. The Role of APOE4 in  
681       Disrupting the Homeostatic Functions of Astrocytes and Microglia in Aging and Alzheimer’s  
682       Disease. *Front. Aging Neurosci.* **11**, (2019).
- 683   5. Brase, L. *et al.* Single-nucleus RNA-sequencing of autosomal dominant Alzheimer disease  
684       and risk variant carriers. *Nat. Commun.* **14**, 2314 (2023).
- 685   6. Zhou, Y. *et al.* Human and mouse single-nucleus transcriptomics reveal TREM2-dependent  
686       and TREM2-independent cellular responses in Alzheimer’s disease. *Nat. Med.* **26**, 131–142  
687       (2020).
- 688   7. Van de Sande, B. *et al.* A scalable SCENIC workflow for single-cell gene regulatory network  
689       analysis. *Nat. Protoc.* **15**, 2247–2276 (2020).
- 690   8. Kunkle, B. W. *et al.* Novel Alzheimer Disease Risk Loci and Pathways in African American  
691       Individuals Using the African Genome Resources Panel: A Meta-analysis. *JAMA Neurol.* **78**,  
692       102–113 (2021).
- 693   9. Schwartzenuber, J. *et al.* Genome-wide meta-analysis, fine-mapping and integrative  
694       prioritization implicate new Alzheimer’s disease risk genes. *Nat. Genet.* **53**, 392–402 (2021).
- 695   10. Lekstrom-Himes, J. & Xanthopoulos, K. G. Biological Role of the CCAAT/Enhancer-binding  
696       Protein Family of Transcription Factors\*. *J. Biol. Chem.* **273**, 28545–28548 (1998).
- 697   11. Gao, T. *et al.* Transcriptional regulation of homeostatic and disease-associated-microglial  
698       genes by IRF1, LXR $\beta$  and CEBP $\alpha$ . *Glia* **67**, 1958–1975 (2019).
- 699   12. Xia, Y. *et al.* C/EBP $\beta$  is a key transcription factor for APOE and preferentially mediates ApoE4  
700       expression in Alzheimer’s disease. *Mol. Psychiatry* **26**, 6002–6022 (2021).

- 701 13. Ejarque-Ortiz, A. *et al.* CCAAT/enhancer binding protein delta in microglial activation. *J.*  
702 *Neurosci. Res.* **88**, 1113–1123 (2010).
- 703 14. Li, Z. *et al.* Interferon Regulatory Factor 7 Promoted Glioblastoma Progression and Stemness  
704 by Modulating IL-6 Expression in Microglia. *J. Cancer* **8**, 207–219 (2017).
- 705 15. Angel, P. & Schorpp-Kistner, M. Jun/Fos. in *Encyclopedic Reference of Genomics and*  
706 *Proteomics in Molecular Medicine* 928–935 (Springer, Berlin, Heidelberg, 2006).  
707 doi:10.1007/3-540-29623-9\_4560.
- 708 16. Roman, C. *et al.* Thyroid hormones upregulate apolipoprotein E gene expression in  
709 astrocytes. *Biochem. Biophys. Res. Commun.* **468**, 190–195 (2015).
- 710 17. Bravo González-Blas, C. *et al.* SCENIC+: single-cell multiomic inference of enhancers and  
711 gene regulatory networks. *Nat. Methods* **20**, 1355–1367 (2023).
- 712 18. Honma, S. *et al.* Dec1 and Dec2 are regulators of the mammalian molecular clock. *Nature*  
713 **419**, 841–844 (2002).
- 714 19. Kawamoto, T. *et al.* A novel autofeedback loop of Dec1 transcription involved in circadian  
715 rhythm regulation. *Biochem. Biophys. Res. Commun.* **313**, 117–124 (2004).
- 716 20. Cho, Y. *et al.* The Basic Helix-Loop-Helix Proteins Differentiated Embryo Chondrocyte (DEC) 1  
717 and DEC2 Function as Corepressors of Retinoid X Receptors. *Mol. Pharmacol.* **76**, 1360–1369  
718 (2009).
- 719 21. Yoshitane, H. *et al.* Functional D-box sequences reset the circadian clock and drive mRNA  
720 rhythms. *Commun. Biol.* **2**, 1–10 (2019).
- 721 22. Podlesny-Drabiniok, A. *et al.* BHLHE40/41 regulate macrophage/microglia responses  
722 associated with Alzheimer’s disease and other disorders of lipid-rich tissues.  
723 2023.02.13.528372 Preprint at <https://doi.org/10.1101/2023.02.13.528372> (2023).
- 724 23. Yoshida, H., Matsui, T., Yamamoto, A., Okada, T. & Mori, K. XBP1 mRNA is induced by ATF6  
725 and spliced by IRE1 in response to ER stress to produce a highly active transcription factor.  
726 *Cell* **107**, 881–891 (2001).
- 727 24. Pan, Y. *et al.* 12-h clock regulation of genetic information flow by XBP1s. *PLOS Biol.* **18**,  
728 e3000580 (2020).

- 729 25. Foulkes, N. S., Borjigin, J., Snyder, S. H. & Sassone-Corsi, P. Transcriptional control of  
730 circadian hormone synthesis via the CREM feedback loop. *Proc. Natl. Acad. Sci.* **93**, 14140–  
731 14145 (1996).
- 732 26. Lech, K. *et al.* Dissecting Daily and Circadian Expression Rhythms of Clock-Controlled Genes  
733 in Human Blood. *J. Biol. Rhythms* **31**, 68–81 (2016).
- 734 27. Sun, N. *et al.* Human microglial state dynamics in Alzheimer’s disease progression. *Cell* **186**,  
735 4386–4403.e29 (2023).
- 736 28. Yan, D. *et al.* SIRT1/FOXO3-mediated autophagy signaling involved in manganese-induced  
737 neuroinflammation in microglia. *Ecotoxicol. Environ. Saf.* **256**, 114872 (2023).
- 738 29. López-Sánchez, N., Ramón-Landreau, M., Trujillo, C., Garrido-García, A. & Frade, J. M. A  
739 Mutant Variant of E2F4 Triggers Multifactorial Therapeutic Effects in 5xFAD Mice. *Mol.*  
740 *Neurobiol.* **59**, 3016–3039 (2022).
- 741 30. Bräuer, A. U., Nitsch, R. & Savaskan, N. E. Identification of macrophage/microglia activation  
742 factor (MAF) associated with late endosomes/lysosomes in microglial cells. *FEBS Lett.* **563**,  
743 41–48 (2004).
- 744 31. Tocco, C., Bertacchi, M. & Studer, M. Structural and Functional Aspects of the  
745 Neurodevelopmental Gene NR2F1: From Animal Models to Human Pathology. *Front. Mol.*  
746 *Neurosci.* **14**, (2021).
- 747 32. Bertacchi, M. *et al.* Mouse Nr2f1 haploinsufficiency unveils new pathological mechanisms of  
748 a human optic atrophy syndrome. *EMBO Mol. Med.* **11**, e10291 (2019).
- 749 33. Zhou, L. *et al.* Degeneration and energy shortage in the suprachiasmatic nucleus underlies  
750 the circadian rhythm disturbance in ApoE<sup>-/-</sup> mice: implications for Alzheimer’s disease. *Sci.*  
751 *Rep.* **6**, 36335 (2016).
- 752 34. Wheeler, M. A. *et al.* MAFG-driven astrocytes promote CNS inflammation. *Nature* **578**, 593–  
753 599 (2020).
- 754 35. Szewczyk, L. M. *et al.* Astrocytic  $\beta$ -catenin signaling via TCF7L2 regulates synapse  
755 development and social behavior. *Mol. Psychiatry* 1–17 (2023) doi:10.1038/s41380-023-  
756 02281-y.

- 757 36. Lee, H. *et al.* ApoE4-dependent lysosomal cholesterol accumulation impairs mitochondrial  
758 homeostasis and oxidative phosphorylation in human astrocytes. *Cell Rep.* **42**, 113183  
759 (2023).
- 760 37. Williams, H. C. *et al.* APOE alters glucose flux through central carbon pathways in astrocytes.  
761 *Neurobiol. Dis.* **136**, 104742 (2020).
- 762 38. Drobny, A. *et al.* The role of lysosomal cathepsins in neurodegeneration: Mechanistic  
763 insights, diagnostic potential and therapeutic approaches. *Biochim. Biophys. Acta BBA - Mol.*  
764 *Cell Res.* **1869**, 119243 (2022).
- 765 39. Fu, L. *et al.* Enhanced expression of FCER1G predicts positive prognosis in multiple  
766 myeloma. *J. Cancer* **11**, 1182–1194 (2020).
- 767 40. Fuller, J. P., Stavenhagen, J. B. & Teeling, J. L. New roles for Fc receptors in  
768 neurodegeneration-the impact on Immunotherapy for Alzheimer’s Disease. *Front. Neurosci.*  
769 **8**, 235 (2014).
- 770 41. Jin, J. *et al.* Shared Molecular Mechanisms between Alzheimer’s Disease and Periodontitis  
771 Revealed by Transcriptomic Analysis. *BioMed Res. Int.* **2021**, 6633563 (2021).
- 772 42. Lanfranco, M. F., Ng, C. A. & Rebeck, G. W. ApoE Lipidation as a Therapeutic Target in  
773 Alzheimer’s Disease. *Int. J. Mol. Sci.* **21**, 6336 (2020).
- 774 43. Martín, M. G., Pfrieder, F. & Dotti, C. G. Cholesterol in brain disease: sometimes determinant  
775 and frequently implicated. *EMBO Rep.* **15**, 1036–1052 (2014).
- 776 44. Iyer, D. N. *et al.* Pathophysiological roles of myristoylated alanine-rich C-kinase substrate  
777 (MARCKS) in hematological malignancies. *Biomark. Res.* **9**, 34 (2021).
- 778 45. Issara-Amphorn, J. *et al.* Myristoylated, alanine-rich C-kinase substrate (MARCKS) regulates  
779 toll-like receptor 4 signaling in macrophages. *Sci. Rep.* **13**, 19562 (2023).
- 780 46. Turco, E. *et al.* Reconstitution defines the roles of p62, NBR1 and TAX1BP1 in ubiquitin  
781 condensate formation and autophagy initiation. *Nat. Commun.* **12**, 5212 (2021).
- 782 47. Wu, C.-H. *et al.* Mutations in the profilin 1 gene cause familial amyotrophic lateral sclerosis.  
783 *Nature* **488**, 499–503 (2012).

- 784 48. Frantzi, M. *et al.* Silencing of Profilin-1 suppresses cell adhesion and tumor growth via  
785 predicted alterations in integrin and Ca<sup>2+</sup> signaling in T24M-based bladder cancer models.  
786 *Oncotarget* **7**, 70750–70768 (2016).
- 787 49. Gallo, M. *et al.* MISC-1/OGC links mitochondrial metabolism, apoptosis and insulin  
788 secretion. *PLoS One* **6**, e17827 (2011).
- 789 50. Keckesova, Z. *et al.* LACTB is a tumour suppressor that modulates lipid metabolism and cell  
790 state. *Nature* **543**, 681–686 (2017).
- 791 51. Tachibana, H. *et al.* The plasma membrane of focal adhesions has a high content of  
792 cholesterol and phosphatidylcholine with saturated acyl chains. *J. Cell Sci.* **136**, jcs260763  
793 (2023).
- 794 52. Liu, C.-C. *et al.* Peripheral apoE4 enhances Alzheimer’s pathology and impairs cognition by  
795 compromising cerebrovascular function. *Nat. Neurosci.* **25**, 1020–1033 (2022).
- 796 53. Wang, H. *et al.* Regulation of Neuroinflammation by Astrocyte-Derived Cholesterol.  
797 <http://biorxiv.org/lookup/doi/10.1101/2022.12.12.520161> (2022)  
798 doi:10.1101/2022.12.12.520161.
- 799 54. Hanisch, U.-K. Microglia as a source and target of cytokines. *Glia* **40**, 140–155 (2002).
- 800 55. Choi, S. S., Lee, H. J., Lim, I., Satoh, J. & Kim, S. U. Human Astrocytes: Secretome Profiles of  
801 Cytokines and Chemokines. *PLOS ONE* **9**, e92325 (2014).
- 802 56. Sofroniew, M. V. Multiple Roles for Astrocytes as Effectors of Cytokines and Inflammatory  
803 Mediators. *The Neuroscientist* **20**, 160–172 (2014).
- 804 57. van der Kant, R. *et al.* Cholesterol Metabolism Is a Druggable Axis that Independently  
805 Regulates Tau and Amyloid- $\beta$  in iPSC-Derived Alzheimer’s Disease Neurons. *Cell Stem Cell*  
806 **24**, 363-375.e9 (2019).
- 807 58. Wang, H. *et al.* Regulation of beta-amyloid production in neurons by astrocyte-derived  
808 cholesterol. *Proc. Natl. Acad. Sci. U. S. A.* **118**, e2102191118 (2021).
- 809 59. Lee, S.-I. *et al.* APOE4-carrying human astrocytes oversupply cholesterol to promote  
810 neuronal lipid raft expansion and A $\beta$  generation. *Stem Cell Rep.* **16**, 2128–2137 (2021).

- 811 60. Ehehalt, R., Keller, P., Haass, C., Thiele, C. & Simons, K. Amyloidogenic processing of the  
812 Alzheimer  $\beta$ -amyloid precursor protein depends on lipid rafts. *J. Cell Biol.* **160**, 113–123  
813 (2003).
- 814 61. Mattioli, I., Mantovani, A. & Locati, M. The tetraspan MS4A family in homeostasis,  
815 immunity, and disease. *Trends Immunol.* **42**, 764–781 (2021).
- 816 62. Koepsell, H. Glucose transporters in brain in health and disease. *Pflüg. Arch. - Eur. J. Physiol.*  
817 **472**, 1299–1343 (2020).
- 818 63. Yan, Q. *et al.* Mechanistic insights into GLUT1 activation and clustering revealed by super-  
819 resolution imaging. *Proc. Natl. Acad. Sci.* **115**, 7033–7038 (2018).
- 820 64. Li, D., Zhang, J. & Liu, Q. Brain cell type-specific cholesterol metabolism and implications for  
821 learning and memory. *Trends Neurosci.* **45**, 401–414 (2022).
- 822 65. Alessandri, B., Gugliotta, M., Levasseur, J. E. & Bullock, M. R. Lactate and glucose as energy  
823 substrates and their role in traumatic brain injury and therapy. *Future Neurol.* **4**, 209–228  
824 (2009).
- 825 66. Graybeal, J. J. *et al.* Human ApoE  $\epsilon$ 4 Alters Circadian Rhythm Activity, IL-1 $\beta$ , and GFAP in  
826 CRND8 Mice. *J. Alzheimers Dis.* **43**, 823–834 (2014).
- 827 67. Wu, L., Zhang, X. & Zhao, L. Human ApoE Isoforms Differentially Modulate Brain Glucose and  
828 Ketone Body Metabolism: Implications for Alzheimer’s Disease Risk Reduction and Early  
829 Intervention. *J. Neurosci.* **38**, 6665–6681 (2018).
- 830 68. Ioannou, M. S. *et al.* Neuron-Astrocyte Metabolic Coupling Protects against Activity-Induced  
831 Fatty Acid Toxicity. *Cell* **177**, 1522-1535.e14 (2019).
- 832 69. Ke, P. *et al.* Relationship between circadian genes and memory impairment caused by sleep  
833 deprivation. *PeerJ* **10**, e13165 (2022).
- 834 70. Niu, L. *et al.* Chronic sleep deprivation altered the expression of circadian clock genes and  
835 aggravated Alzheimer’s disease neuropathology. *Brain Pathol.* **32**, e13028 (2022).
- 836 71. Ni, J. *et al.* An impaired intrinsic microglial clock system induces neuroinflammatory  
837 alterations in the early stage of amyloid precursor protein knock-in mouse brain. *J.*  
838 *Neuroinflammation* **16**, 173 (2019).



839 72. Guzmán, M. & Blázquez, C. Ketone body synthesis in the brain: possible neuroprotective  
840 effects. *Prostaglandins Leukot. Essent. Fatty Acids* **70**, 287–292 (2004).

841 73. Zhang, Z. *et al.* Circadian rhythm and atherosclerosis (Review). *Exp. Ther. Med.* **20**, 96  
842 (2020).

843 74. Lam, M. T. Y. *et al.* Rev-Erbs repress macrophage gene expression by inhibiting enhancer-  
844 directed transcription. *Nature* **498**, 511–515 (2013).

845 75. Lee, J. *et al.* Microglial REV-ERBa regulates inflammation and lipid droplet formation to drive  
846 tauopathy in male mice. *Nat. Commun.* **14**, 5197 (2023).

847 76. Eitan, E., Suire, C., Zhang, S. & Mattson, M. P. Impact of lysosome status on extracellular  
848 vesicle content and release. *Ageing Res. Rev.* **32**, 65–74 (2016).

849 77. Nguyen, M.-A. *et al.* Extracellular Vesicles Secreted by Atherogenic Macrophages Transfer  
850 MicroRNA to Inhibit Cell Migration. *Arterioscler. Thromb. Vasc. Biol.* **38**, 49–63 (2018).

851 78. Bouchareychas, L. *et al.* Macrophage Exosomes Resolve Atherosclerosis by Regulating  
852 Hematopoiesis and Inflammation via MicroRNA Cargo. *Cell Rep.* **32**, 107881 (2020).

853 79. Gabrielli, M., Raffaele, S., Fumagalli, M. & Verderio, C. The multiple faces of extracellular  
854 vesicles released by microglia: Where are we 10 years after? *Front. Cell. Neurosci.* **16**,  
855 (2022).

856 80. Strauss, K. *et al.* Exosome Secretion Ameliorates Lysosomal Storage of Cholesterol in  
857 Niemann-Pick Type C Disease\*. *J. Biol. Chem.* **285**, 26279–26288 (2010).

858 81. Aibar, S. *et al.* SCENIC: single-cell regulatory network inference and clustering. *Nat. Methods*  
859 **14**, 1083–1086 (2017).

860 82. Kamimoto, K. *et al.* Dissecting cell identity via network inference and in silico gene  
861 perturbation. *Nature* **614**, 742–751 (2023).

862 83. Supek, F., Bošnjak, M., Škunca, N. & Šmuc, T. REVIGO Summarizes and Visualizes Long Lists  
863 of Gene Ontology Terms. *PLOS ONE* **6**, e21800 (2011).

864

865

## 866 Acknowledgments

867 Doctors Bruno A. Benitez, and Oscar Harari contributed equally to this work as co-senior  
868 authors. Data sharing for this project were supported by The Dominantly Inherited Alzheimer  
869 Network (DIAN, U19AG032438), funded by the National Institute on Aging (NIA), the  
870 Alzheimer's Association (SG-20-690363-DIAN), the German Center for Neurodegenerative  
871 Diseases (DZNE), Raul Carrea Institute for Neurological Research (FLENI), Partial support by the  
872 Research and Development Grants for Dementia from Japan Agency for Medical Research and  
873 Development, AMED, and the Korea Health Technology R&D Project through the Korea Health  
874 Industry Development Institute (KHIDI), Spanish Institute of Health Carlos III (ISCIII), Canadian  
875 Institutes of Health Research (CIHR), Canadian Consortium of Neurodegeneration and Aging,  
876 Brain Canada Foundation, and Fonds de Recherche du Québec – Santé. DIAN Study investigators  
877 have reviewed this manuscript for scientific content and consistency of data interpretation with  
878 previous DIAN Study publications. We acknowledge the altruism of the participants and their  
879 families and the contributions of the DIAN research and support staff at each of the  
880 participating sites for their contributions to this study.

881 The results published here are partly based on data obtained from the AD Knowledge Portal  
882 (<https://adknowledgeportal.org>). Study data were provided by the Rush Alzheimer's Disease  
883 Center, Rush University Medical Center, Chicago. Data collection was supported through funding  
884 by NIA grants P30AG10161 (ROS), R01AG15819 (ROSMAP; genomics and RNAseq), R01AG17917  
885 (MAP), R01AG30146, R01AG36042 (5hC methylation, ATACseq), RC2AG036547 (H3K9Ac),  
886 R01AG36836 (RNAseq), R01AG48015 (monocyte RNAseq) RF1AG57473 (single nucleus  
887 RNAseq), U01AG32984 (genomic and whole exome sequencing), U01AG46152 (ROSMAP AMP-  
888 AD, targeted proteomics), U01AG46161(TMT proteomics), U01AG61356 (whole genome  
889 sequencing, targeted proteomics, ROSMAP AMP-AD), the Illinois Department of Public Health  
890 (ROSMAP), and the Translational Genomics Research Institute (genomic). Additional phenotypic  
891 data can be requested at [www.radc.rush.edu](http://www.radc.rush.edu).

892 This work was possible thanks to the following governmental grants from the National Institute  
893 of Health: NIA R01AG057777 (OH), R56AG067764 (OH), U01AG072464 (OH), R01AG074012  
894 (OH), U19AG032438 (RJB), NINDS R01NS118146 (BAB), R21NS127211 (BAB), NIA T32AG058518  
895 (LB), O.H. is an Archer Foundation Research Scientist.

896 This work was supported by access to equipment made possible by the Departments of  
897 Neurology and Psychiatry at Washington University School of Medicine.

898 The funders of the study had no role in the collection, analysis, or interpretation of data, in the  
899 writing of the report, or in the decision to submit the paper for publication.

900 Figure 1 was created with BioRender.com. Bing Copilot was used to improve grammar and flow  
901 of text.

## 902 Author Contributions

903 L.B. performed the quality control, bioinformatic analyses, interpreted the results, created the  
904 figures, and wrote the manuscript. Y.Y. ran the pySCENIC analyses. E.M. was involved in the DIAN  
905 sample collection, profiling and provided a critical review of the manuscript. O.H. and B.A.B.  
906 were involved in experiment design, analysis, data interpretation, intellectual contribution, and  
907 manuscript writing and review.

908 **Competing Interests**

909 E.M. receives Grant Funding from NIA; Institutional funding from Eli Lilly, Hoffmann-La Roche,  
910 Eisai. He is a DSMB member (paid directly) for Alector; Eli Lilly; a Scientific Advisory Board  
911 Member (paid directly) for Alzamend, Fondation Alzheimer. He acts as a Consultant/Advisor for  
912 Sage Therapeutics, Eli Lilly, Sanofi, AstraZeneca, Hoffmann La-Roche. The other authors have no  
913 conflicts of interest to disclose.

914 **Supplementary Information**

915 Supplementary Information - .pdf file
